# Supplementary material for: Role and utility of COVID-19 laboratory testing in low-income and middle-income countries: protocol for rapid evidence synthesis
Source: HighWire-hosted journal article supplement (doi:10.1136/bmjopen-2021-050296), 2021-10-01
Supplement: bmjopen-2021-050296supp001_data_supplement.pdf [file bmjopen-2021-050296supp001_data_supplement.pdf]

**Electronic Search Strategy In PubMed:** <https://pubmed.ncbi.nlm.nih.gov/>**Search #1: Corona Virus**

(Coronavirus OR Corona virus OR Coronavirus-2 OR Corona virus-2 OR Novel coronavirus OR Novel corona virus OR Coronavirus Infection\* OR Corona virus Infection\* OR Coronavirus disease OR Corona virus disease OR Coronavirus disease 2019 OR Corona virus disease 2019 OR Coronavirus disease-19 OR Corona virus disease-19 OR 2019 novel coronavirus OR 2019 novel corona virus OR 2019 novel coronavirus disease OR 2019 novel corona virus disease OR 2019 novel coronavirus disease OR 2019 novel coronavirus infection\* OR 2019 novel corona virus infection\* OR Novel Respiratory 2019 OR Coronavirus OR Novel Respiratory 2019 Corona virus OR 2019-nCoV infection\* OR 2019-nCoV OR COVID-19 OR COVID19 OR COVID-19 virus infection\* OR COVID-19 pandemic OR SARS-Cov-2 OR SARS-CoV-2 infection\* OR SARS-COV2 OR Wuhan pneumonia)[Text Word]

AND

**Search #2: Testing**

((Test\*[Mesh Terms] OR (Test\* OR Diagnos\* OR Point of care test\* OR Laboratory test\* OR Antibod\* OR Diagnostic kit OR Antigen test\* OR Antigen detect\* OR Antigen reagent OR Antigen strip\* OR Rapid test\* OR Rapid kit\* OR IgM OR IgG OR IgA OR Serological OR ELISA)[Title/Abstract]))

AND

**Search #3: Low and Middle Income Countries**

(afghan[Text Word] OR afghans[Text Word] OR afghani[Text Word] OR albanian[Text Word] OR albanians[Text Word] OR algerian[Text Word] OR algerians[Text Word] OR american samoan[Text Word] OR american samoans[Text Word] OR angolan[Text Word] OR angolans[Text Word] OR antiguan[Text Word] OR antiguans[Text Word] OR barbudan[Text Word] OR berbudans[Text Word] OR argentine[Text Word] OR argentines[Text Word] OR argentinian[Text Word] OR argentinians[Text Word] OR argentinean[Text Word] OR argentineans[Text Word] OR armenian[Text Word] OR armenians[Text Word] OR aruban[Text Word] OR arubans[Text Word] OR azerbaijani[Text Word] OR azerbaijanis[Text Word] OR bahraini[Text Word] OR bahrainis[Text Word] OR bangladeshi[Text Word] OR bangladeshis[Text Word] OR bangalees[Text Word] OR bayan[Text Word] OR bajans[Text Word] OR belarusian[Text Word] OR belarusians[Text Word] OR byelorussian[Text Word] OR byelorussians[Text Word] OR belizean[Text Word] OR belizeans[Text Word] OR beninese[Text Word] OR benineses[Text Word] OR bhutanese[Text Word] OR bolivian[Text Word] OR bolivians[Text Word] OR bosnian[Text Word] OR bosnians[Text Word] OR botswana[Text Word] OR batswana[Text Word] OR brazilian[Text Word] OR brazilians[Text Word] OR brasilian[Text Word] OR brasilians[Text Word] OR bulgarian[Text Word] OR bulgarians[Text Word] OR burkinabe[Text Word] OR burkinese[Text Word] OR burundian[Text Word] OR burundians[Text Word] OR cape verdean[Text Word] OR cape verdeans[Text Word] OR cabo verdean[Text Word] OR cabo verdeans[Text Word] OR cambodian[Text Word] OR cambodians[Text Word] OR khmer[Text Word] OR cameroonian[Text Word] OR cameroonians[Text Word] OR central african[Text Word] OR central africans[Text Word] OR chadian[Text Word] OR chadians[Text Word] OR chilean[Text Word] OR chileans[Text Word] OR chinese[Text Word] OR colombian[Text Word] OR colombians[Text Word] OR comorian[Text Word] OR comorians[Text Word] OR congolese[Text Word] OR costa rican[Text Word] OR costa ricans[Text Word] OR ivorian[Text Word] OR ivorians[Text Word] OR croatian[Text Word] OR croatians[Text Word]

Word] OR cuban[Text Word] OR cubans[Text Word] OR cyprriot[Text Word] OR cypriots[Text Word] OR czech[Text Word] OR czechs[Text Word] OR djiboutian[Text Word] OR djiboutians[Text Word] OR dominican[Text Word] OR dominicans[Text Word] OR ecuadorian[Text Word] OR ecuadorians[Text Word] OR egyptian[Text Word] OR egyptians[Text Word] OR salvadoran[Text Word] OR salvadorans[Text Word] OR equatorial guinean[Text Word] OR equatorial guineans[Text Word] OR equatoguinean[Text Word] OR equatoguineans[Text Word] OR eritrean[Text Word] OR eritreans[Text Word] OR estonian[Text Word] OR estonians[Text Word] OR swazi[Text Word] OR swazis[Text Word] OR swati[Text Word] OR swatis[Text Word] OR ethiopian[Text Word] OR ethiopians[Text Word] OR fijian[Text Word] OR fijians[Text Word] OR gabonese[Text Word] OR gabonaise[Text Word] OR gambian[Text Word] OR gambians[Text Word] OR georgian[Text Word] OR georgians[Text Word] OR ghanaian[Text Word] OR ghanaians[Text Word] OR gibraltarian[Text Word] OR gibraltarians[Text Word] OR greek[Text Word] OR greeks[Text Word] OR grenadian[Text Word] OR grenadians[Text Word] OR guamanian[Text Word] OR guamanians[Text Word] OR guatemalan[Text Word] OR guatemalans[Text Word] OR guinean[Text Word] OR guineans[Text Word] OR bissau guinean[Text Word] OR bissau guineans[Text Word] OR guyanese[Text Word] OR haitian[Text Word] OR haitians[Text Word] OR honduran[Text Word] OR hondurans[Text Word] OR hungarian[Text Word] OR hungarians[Text Word] OR indian[Text Word] OR indians[Text Word] OR indonesian[Text Word] OR indonesians[Text Word] OR iranian[Text Word] OR iranians[Text Word] OR iraqian[Text Word] OR iraqians[Text Word] OR iraqi[Text Word] OR iraqis[Text Word] OR manx[Text Word] OR jamaican[Text Word] OR jamaicans[Text Word] OR jordanian[Text Word] OR jordanians[Text Word] OR kazakhstani[Text Word] OR kazakhstanis[Text Word] OR kenyan[Text Word] OR kenyans[Text Word] OR kirabati[Text Word] OR kirabatian[Text Word] OR kirabatians[Text Word] OR korean[Text Word] OR koreans[Text Word] OR kosovar[Text Word] OR kosovars[Text Word] OR kosovan[Text Word] OR kosovans[Text Word] OR kyrgyzstani[Text Word] OR kyrgyzstanis[Text Word] OR kyrgyz[Text Word] OR lao[Text Word] OR laotian[Text Word] OR laotians[Text Word] OR latvian[Text Word] OR latvians[Text Word] OR lebanese[Text Word] OR lesothan[Text Word] OR lesothans[Text Word] OR lesothonian[Text Word] OR lesothonians[Text Word] OR mosotho[Text Word] OR basotho[Text Word] OR liberian[Text Word] OR liberians[Text Word] OR libyan[Text Word] OR libyans[Text Word] OR lithuanian[Text Word] OR lithuanians[Text Word] OR macanese[Text Word] OR macedonian[Text Word] OR macedonians[Text Word] OR malagasy[Text Word] OR madagascan[Text Word] OR madagascans[Text Word] OR malawian[Text Word] OR malawians[Text Word] OR malaysian[Text Word] OR malaysians[Text Word] OR maldivian[Text Word] OR maldivians[Text Word] OR malian[Text Word] OR malians[Text Word] OR maltese[Text Word] OR marshallese[Text Word] OR marshallese[Text Word] OR mauritanian[Text Word] OR mauritanians[Text Word] OR mauritian[Text Word] OR mauritians[Text Word] OR mexican[Text Word] OR mexicans[Text Word] OR micronesia[Text Word] OR micronesians[Text Word] OR moldovan[Text Word] OR moldovans[Text Word] OR mongolian[Text Word] OR mongolians[Text Word] OR mongol[Text Word] OR montenegrin[Text Word] OR montenegrins[Text Word] OR moroccan[Text Word] OR moroccans[Text Word] OR mozambican[Text Word] OR mozambicans[Text Word] OR burmese[Text Word] OR myanma[Text Word] OR namibian[Text Word] OR namibians[Text Word] OR nauruan[Text Word] OR nauruans[Text Word] OR nepali[Text Word] OR nepalese[Text Word] OR netherlands antillean[Text Word] OR netherlands antilleans[Text Word] OR nicaraguan[Text Word] OR nicaraguans[Text Word] OR nigerien[Text Word] OR nigeriens[Text Word] OR nigerian[Text Word] OR nigerians[Text Word] OR northern mariana islander[Text Word] OR northern mariana islanders[Text Word] OR mariana[Text Word] OR marianas[Text Word] OR omani[Text Word] OR omanis[Text Word] OR pakistani[Text Word] OR pakistanis[Text Word] OR palauan[Text Word] OR palauans[Text Word] OR panamanian[Text Word] OR panamanians[Text Word] OR papua new guinean[Text Word] OR papua

new guineans[Text Word] OR paraguayans[Text Word] OR paraguayans[Text Word] OR peruvian[Text Word] OR peruvians[Text Word] OR philippine[Text Word] OR philippines[Text Word] OR filipino[Text Word] OR filipinos[Text Word] OR filipina[Text Word] OR filipinas[Text Word] OR polish[Text Word] OR pole[Text Word] OR poles[Text Word] OR portuguese[Text Word] OR puerto rican[Text Word] OR puerto ricans[Text Word] OR romanian[Text Word] OR romanians[Text Word] OR russian[Text Word] OR russians[Text Word] OR soviet people[Text Word] OR soviet population[Text Word] OR rwandan[Text Word] OR rwandans[Text Word] OR rwandese[Text Word] OR ruandan[Text Word] OR ruandans[Text Word] OR ruandese[Text Word] OR samoan[Text Word] OR samoans[Text Word] OR sao tomean[Text Word] OR sao tomeans[Text Word] OR santomean[Text Word] OR santomeans[Text Word] OR saudi arabian[Text Word] OR saudi arabians[Text Word] OR saudi[Text Word] OR saudis[Text Word] OR senegalese[Text Word] OR serbian[Text Word] OR serbians[Text Word] OR montenegrin[Text Word] OR montenegrins[Text Word] OR seychellois[Text Word] OR seychelloise[Text Word] OR seychelloises[Text Word] OR sierra leonean[Text Word] OR sierra leoneans[Text Word] OR slovak[Text Word] OR slovaks[Text Word] OR slovene[Text Word] OR slovenes[Text Word] OR solomon islander[Text Word] OR solomon islanders[Text Word] OR somali[Text Word] OR somalis[Text Word] OR south african[Text Word] OR south africans[Text Word] OR south sudanese[Text Word] OR sri lankan[Text Word] OR sri lankans[Text Word] OR ceylonese[Text Word] OR kittitian[Text Word] OR kittitians[Text Word] OR nevisian[Text Word] OR nevisians[Text Word] OR saint lucian[Text Word] OR saint lucians[Text Word] OR vincentian[Text Word] OR vincentians[Text Word] OR sudanese[Text Word] OR surinamese[Text Word] OR surinameses[Text Word] OR syrian[Text Word] OR syrians[Text Word] OR tajik[Text Word] OR tajiks[Text Word] OR tajikistani[Text Word] OR tajikistanis[Text Word] OR tanzanian[Text Word] OR tanzanians[Text Word] OR tanganyikan[Text Word] OR tanganyikans[Text Word] OR thai[Text Word] OR timorese[Text Word] OR timorese[Text Word] OR togolese[Text Word] OR tongan[Text Word] OR tongans[Text Word] OR trinidadian[Text Word] OR trinidadians[Text Word] OR tobagonian[Text Word] OR tobagonians[Text Word] OR tunisian[Text Word] OR tunisians[Text Word] OR turk[Text Word] OR turks[Text Word] OR turkish[Text Word] OR turkmen[Text Word] OR turkmens[Text Word] OR tuvaluan[Text Word] OR tuvaluans[Text Word] OR ugandan[Text Word] OR ugandans[Text Word] OR ukrainian[Text Word] OR ukrainians[Text Word] OR uruguayan[Text Word] OR uruguayans[Text Word] OR uzbek[Text Word] OR uzbeks[Text Word] OR vanuatu[Text Word] OR vanuatuans[Text Word] OR vanuatuans[Text Word] OR venezuelan[Text Word] OR venezuelans[Text Word] OR vietnamese[Text Word] OR yemeni[Text Word] OR yemenis[Text Word] OR yemenite[Text Word] OR yemenites[Text Word] OR yemenese[Text Word] OR yugoslav[Text Word] OR yugoslavs[Text Word] OR yugoslavian[Text Word] OR yugoslavians[Text Word] OR zambian[Text Word] OR zambians[Text Word] OR zimbabwean[Text Word] OR zimbabweans[Text Word]

AND

**Search #4: Time limits at the time COVID-19 was described to date**

Filters: From 2019-2021
