# Supplementary material for: Role and utility of COVID-19 laboratory testing in low-income and middle-income countries: protocol for rapid evidence synthesis
Source: HighWire-hosted journal article supplement (doi:10.1136/bmjopen-2021-050296), 2021-10-01
Supplement: bmjopen-2021-050296supp002_data_supplement.pdf [file bmjopen-2021-050296supp002_data_supplement.pdf]

## PRISMA-P 2015 Checklist

This checklist has been adapted for use with protocol submissions to *Systematic Reviews* from Table 3 in Moher D et al: Preferred reporting items for systematic review and meta-analysis protocols (PRISMA-P) 2015 statement. *Systematic Reviews* 2015 4:1

| Section/topic                     | #  | Checklist item                                                                                  | Information reported                |                          | Line number(s)                    |
|-----------------------------------|----|-------------------------------------------------------------------------------------------------|-------------------------------------|--------------------------|-----------------------------------|
|                                   |    |                                                                                                 | Yes                                 | No                       |                                   |
| <b>ADMINISTRATIVE INFORMATION</b> |    |                                                                                                 |                                     |                          |                                   |
| <b>Title</b>                      |    |                                                                                                 |                                     |                          |                                   |
| Identification                    | 1a | Identify the report as a protocol of a systematic review                                        | <input checked="" type="checkbox"/> | <input type="checkbox"/> | 1-3                               |
| Update                            | 1b | If the protocol is for an update of a previous systematic review, identify as such              | <input type="checkbox"/>            | <input type="checkbox"/> | Not applicable                    |
| Registration                      | 2  | If registered, provide the name of the registry (e.g., PROSPERO) and registration number in the | <input checked="" type="checkbox"/> | <input type="checkbox"/> | 83, 145-146<br><br>CRD42020209528 |

| Section/topic  | #  | Checklist item                                                                                                                                | Information reported                |                          | Line number(s)                                                                                                                                                                                                                                                                                                                                                                                                                                                                                                                                                                                                                                                                                                                                                                                                                                                                                                                                                                                                                                                                                                                                                                                                                                                                                                                                                                                                                                                                                                                                                                                                                                                                                                                                                                                                      |
|----------------|----|-----------------------------------------------------------------------------------------------------------------------------------------------|-------------------------------------|--------------------------|---------------------------------------------------------------------------------------------------------------------------------------------------------------------------------------------------------------------------------------------------------------------------------------------------------------------------------------------------------------------------------------------------------------------------------------------------------------------------------------------------------------------------------------------------------------------------------------------------------------------------------------------------------------------------------------------------------------------------------------------------------------------------------------------------------------------------------------------------------------------------------------------------------------------------------------------------------------------------------------------------------------------------------------------------------------------------------------------------------------------------------------------------------------------------------------------------------------------------------------------------------------------------------------------------------------------------------------------------------------------------------------------------------------------------------------------------------------------------------------------------------------------------------------------------------------------------------------------------------------------------------------------------------------------------------------------------------------------------------------------------------------------------------------------------------------------|
|                |    |                                                                                                                                               | Yes                                 | No                       |                                                                                                                                                                                                                                                                                                                                                                                                                                                                                                                                                                                                                                                                                                                                                                                                                                                                                                                                                                                                                                                                                                                                                                                                                                                                                                                                                                                                                                                                                                                                                                                                                                                                                                                                                                                                                     |
|                |    | Abstract                                                                                                                                      |                                     |                          |                                                                                                                                                                                                                                                                                                                                                                                                                                                                                                                                                                                                                                                                                                                                                                                                                                                                                                                                                                                                                                                                                                                                                                                                                                                                                                                                                                                                                                                                                                                                                                                                                                                                                                                                                                                                                     |
| <b>Authors</b> |    |                                                                                                                                               |                                     |                          |                                                                                                                                                                                                                                                                                                                                                                                                                                                                                                                                                                                                                                                                                                                                                                                                                                                                                                                                                                                                                                                                                                                                                                                                                                                                                                                                                                                                                                                                                                                                                                                                                                                                                                                                                                                                                     |
| Contact        | 3a | Provide name, institutional affiliation, and e-mail address of all protocol authors; provide physical mailing address of corresponding author | <input checked="" type="checkbox"/> | <input type="checkbox"/> | <p>11-42</p> <p>Names:</p> <p>Ojiambo Kevin Ouma<sup>1,2</sup>, Kisangala Ephraim<sup>1,3</sup>, Eve Namisango<sup>1,4</sup>, Nakalembe Loyce<sup>1,5</sup>, Nalugoda Fred<sup>1,6</sup>, Regina Ndagire<sup>1,3</sup>, Rachel Nante Wangi<sup>1,3</sup>, Brenda Allen Kawala<sup>1,7</sup>, Thomas Katairo<sup>1,8</sup>, Allen Eva Okullo<sup>1,2</sup>, Robert Apunyo<sup>1</sup>, Daniel Semakula<sup>1,10</sup>, Ash Luwambo<sup>1,11</sup>, Alison A. Kinengyere<sup>1,10</sup>, Nelson K. Sewankambo<sup>1,2,6</sup>, Sheila N. Balinda<sup>12</sup>, Moses Ocan<sup>1,2,13</sup>, Ekwaro A. Obuku<sup>1,2,14</sup></p> <p>Author Affiliations</p> <p>pages 400-422</p> <ol style="list-style-type: none"> <li>1. Africa Centre for Systematic Reviews and Knowledge Translation, College of Health Sciences, Makerere University, Kampala, Uganda</li> <li>2. Clinical Epidemiology Unit, Department of Medicine, College of Health Sciences, Makerere University, Kampala, Uganda</li> <li>3. Kairos Hospital, Namuwongo, Kampala, Uganda</li> <li>4. Cicely Saunders Institute, King's College London</li> <li>5. Department of pharmacology, College of Medicine, Health and Life sciences, King Ceasor University, Kampala, Uganda</li> <li>6. Rakai Health Sciences Program (RHSP), School of Public Health, College of Health Sciences, Makerere University, Kampala, Uganda.</li> <li>7. Section for Epidemiology and Social Medicine, Department of Public Health, Institute of Medicine. The Sahlgrenska Academy at University of Gothenburg, Gothenburg, Sweden</li> <li>8. Infectious Diseases Research Collaboration (IDRC), Kampala, Uganda</li> <li>9. Regional East African Community Health (REACH) Policy Initiative, College of Health Sciences, Makerere University, Kampala,</li> </ol> |

| Section/topic | #  | Checklist item                                                               | Information reported                |                          | Line number(s)                                                                                                                                                                                                                                                                                                                                                                                                                                                                                                                                                                                                                                                                                                                                                                                                                                                                                                                                                                                                                                                                                                                                                                                                                                                                                                                                                                                                                                                                                                                                                                                                                                                                                                                                                                                                                                                                                                                                                                                                                                                                                                                                                                                      |
|---------------|----|------------------------------------------------------------------------------|-------------------------------------|--------------------------|-----------------------------------------------------------------------------------------------------------------------------------------------------------------------------------------------------------------------------------------------------------------------------------------------------------------------------------------------------------------------------------------------------------------------------------------------------------------------------------------------------------------------------------------------------------------------------------------------------------------------------------------------------------------------------------------------------------------------------------------------------------------------------------------------------------------------------------------------------------------------------------------------------------------------------------------------------------------------------------------------------------------------------------------------------------------------------------------------------------------------------------------------------------------------------------------------------------------------------------------------------------------------------------------------------------------------------------------------------------------------------------------------------------------------------------------------------------------------------------------------------------------------------------------------------------------------------------------------------------------------------------------------------------------------------------------------------------------------------------------------------------------------------------------------------------------------------------------------------------------------------------------------------------------------------------------------------------------------------------------------------------------------------------------------------------------------------------------------------------------------------------------------------------------------------------------------------|
|               |    |                                                                              | Yes                                 | No                       |                                                                                                                                                                                                                                                                                                                                                                                                                                                                                                                                                                                                                                                                                                                                                                                                                                                                                                                                                                                                                                                                                                                                                                                                                                                                                                                                                                                                                                                                                                                                                                                                                                                                                                                                                                                                                                                                                                                                                                                                                                                                                                                                                                                                     |
|               |    |                                                                              |                                     |                          | <p>Uganda</p> <p>10. Albert Cook Library, College of Health Sciences, Makerere University, Kampala, Uganda</p> <p>11. Communications Section, Makerere University College of Health Sciences, Kampala Uganda.</p> <p>12. Medical Research Council, Uganda Virus Research Institute, Entebbe, Uganda</p> <p>13. Department of Pharmacology, School of Biomedical Sciences, College of Health Sciences, Makerere University, Kampala, Uganda</p> <p>14. Faculty of Epidemiology and Population Health, London School of Hygiene and Tropical Medicine, London, United Kingdom</p> <p>Email address</p> <p>Pages 310-318</p> <p><sup>1,2</sup>Kevin.O.Ouma,<a href="mailto:ojambok@gmail.com">ojambok@gmail.com</a>; <sup>1,3</sup>EphraimKisangala,<a href="mailto:ephraimkis@gmail.com">ephraimkis@gmail.com</a>; <sup>1,4</sup>EveNamisango,<a href="mailto:enamisango@gmail.com">enamisango@gmail.com</a>; <sup>1,5</sup>Loyce,Nakalembe,<a href="mailto:nakaloy2011@gmail.com">nakaloy2011@gmail.com</a>; <sup>1,6</sup>FredNalugoda,<a href="mailto:fnalugoda@rhsp.org">fnalugoda@rhsp.org</a>; <sup>1,2</sup>ReginaNdagire,<a href="mailto:ndaginar@gmail.com">ndaginar@gmail.com</a>; <sup>1,2</sup>RachelN.Wangi,<a href="mailto:wangirachel@gmail.com">wangirachel@gmail.com</a>; <sup>7</sup>BrendaA.Kawala,<a href="mailto:brendakawala@gmail.com">brendakawala@gmail.com</a>; <sup>1,8</sup>ThomasKatairo,<a href="mailto:katairothomas@gmail.com">katairothomas@gmail.com</a>; <sup>1</sup>RobertApunyo,<a href="mailto:rapunyo@gmail.com">rapunyo@gmail.com</a>; <sup>1,2,6,9</sup>DanielSemakula,<a href="mailto:semakuladaniel@gmail.com">semakuladaniel@gmail.com</a>; <sup>1,10</sup>AlisonA.Kinengyere,<a href="mailto:alison.kine@gmail.com">alison.kine@gmail.com</a>; <sup>1,11</sup>AshLuwambo, <sup>1,2,6,9</sup>Sewankambo,<a href="mailto:sewankam@infocom.co.ug">sewankam@infocom.co.ug</a>; <sup>12</sup>Sheila N.Balinda,<a href="mailto:sbalinda@gmail.com">sbalinda@gmail.com</a>; <sup>1,13</sup>MosesOcan,<a href="mailto:ocanmoses@gmail.com">ocanmoses@gmail.com</a>; <sup>1,3,14</sup> Ekwaro A. Obuku,<a href="mailto:ekwaro@gmail.com">ekwaro@gmail.com</a></p> |
| Contributions | 3b | Describe contributions of protocol authors and identify the guarantor of the | <input checked="" type="checkbox"/> | <input type="checkbox"/> | <p>294-298</p> <p>MO, EAO and KOO developed the idea into a concept. KOO, EK, EN and LN wrote the initial protocol and AAK developed the search strategy, which was then piloted by the study team. MO and EAO appraised the draft protocol, reviewed and approved final version for publication. All authors read, critiqued and approved the final version of the protocol.</p>                                                                                                                                                                                                                                                                                                                                                                                                                                                                                                                                                                                                                                                                                                                                                                                                                                                                                                                                                                                                                                                                                                                                                                                                                                                                                                                                                                                                                                                                                                                                                                                                                                                                                                                                                                                                                   |

| Section/topic     | #  | Checklist item                                                                                                                                                                                  | Information reported                |                          | Line number(s)                                                                                               |
|-------------------|----|-------------------------------------------------------------------------------------------------------------------------------------------------------------------------------------------------|-------------------------------------|--------------------------|--------------------------------------------------------------------------------------------------------------|
|                   |    |                                                                                                                                                                                                 | Yes                                 | No                       |                                                                                                              |
|                   |    | review                                                                                                                                                                                          |                                     |                          |                                                                                                              |
| <b>Amendments</b> | 4  | If the protocol represents an amendment of a previously completed or published protocol, identify as such and list changes; otherwise, state plan for documenting important protocol amendments | <input type="checkbox"/>            | <input type="checkbox"/> | Not applicable                                                                                               |
| <b>Support</b>    |    |                                                                                                                                                                                                 |                                     |                          |                                                                                                              |
| <b>Sources</b>    | 5a | Indicate sources of financial or other support for the review                                                                                                                                   | <input checked="" type="checkbox"/> | <input type="checkbox"/> | 289-291<br>This study is funded by Makerere University Research and Innovation Fund, (MakRIF-COVID-19 fund). |
| <b>Sponsor</b>    | 5b | Provide name for the review                                                                                                                                                                     | <input checked="" type="checkbox"/> | <input type="checkbox"/> | 289-291                                                                                                      |

| Section/topic          | # | Checklist item                                                                                     | Information reported                |                          | Line number(s)                                                                                                                                       |
|------------------------|---|----------------------------------------------------------------------------------------------------|-------------------------------------|--------------------------|------------------------------------------------------------------------------------------------------------------------------------------------------|
|                        |   |                                                                                                    | Yes                                 | No                       |                                                                                                                                                      |
|                        |   | funder and/or sponsor                                                                              |                                     |                          | This study is funded by Makerere University Research and Innovation Fund, (MakRIF-COVID-19 fund). The funder had no role in developing the protocol. |
| Role of sponsor/funder | 5 | Describe roles of funder(s), sponsor(s), and/or institution(s), if any, in developing the protocol | <input checked="" type="checkbox"/> | <input type="checkbox"/> | 291<br>The funder/sponsor had no role in developing the protocol                                                                                     |
| <b>INTRODUCTION</b>    |   |                                                                                                    |                                     |                          |                                                                                                                                                      |
| Rationale              | 6 | Describe the rationale for the review in the context of what is already known                      | <input checked="" type="checkbox"/> | <input type="checkbox"/> | 132-143                                                                                                                                              |
| Objectives             | 7 | Provide an explicit statement of the question(s) the review will address with                      | <input checked="" type="checkbox"/> | <input type="checkbox"/> | 149-151<br>What is the effectiveness of laboratory testing strategy for COVID-19 among hospital and community populations in LMICs?                  |

| Section/topic               | # | Checklist item                                                                                                                                                                                                            | Information reported                |                          | Line number(s)                                                                                                                                                                                                                                                                                                                                                                                                                                                                                                                                                                                                                                                                                                                                                               |
|-----------------------------|---|---------------------------------------------------------------------------------------------------------------------------------------------------------------------------------------------------------------------------|-------------------------------------|--------------------------|------------------------------------------------------------------------------------------------------------------------------------------------------------------------------------------------------------------------------------------------------------------------------------------------------------------------------------------------------------------------------------------------------------------------------------------------------------------------------------------------------------------------------------------------------------------------------------------------------------------------------------------------------------------------------------------------------------------------------------------------------------------------------|
|                             |   |                                                                                                                                                                                                                           | Yes                                 | No                       |                                                                                                                                                                                                                                                                                                                                                                                                                                                                                                                                                                                                                                                                                                                                                                              |
|                             |   | reference to participants, interventions, comparators, and outcomes (PICO)                                                                                                                                                |                                     |                          |                                                                                                                                                                                                                                                                                                                                                                                                                                                                                                                                                                                                                                                                                                                                                                              |
| <b>METHODS</b>              |   |                                                                                                                                                                                                                           |                                     |                          |                                                                                                                                                                                                                                                                                                                                                                                                                                                                                                                                                                                                                                                                                                                                                                              |
| <b>Eligibility criteria</b> | 8 | Specify the study characteristics (e.g., PICO, study design, setting, time frame) and report characteristics (e.g., years considered, language, publication status) to be used as criteria for eligibility for the review | <input checked="" type="checkbox"/> | <input type="checkbox"/> | <p>152-154, 161-170</p> <p><i>Inclusion criteria</i></p> <p>Articles published in peer reviewed journals from January 2020 -to-date</p> <p>Articles on polymerase chain reaction (PCR) assay tests for COVID-19, Rapid/ point of care diagnostic tests, and serology tests (IgG, IgM) in LMICs</p> <p>Articles of studies conducted on Adults (18 years and above) in LMIC settings</p> <p>Article of observational studies (cross sectional, case control and cohort studies), systematic reviews and Randomized Control Trials on COVID-19 laboratory testing</p> <p><i>Exclusion criteria</i></p> <p>Articles on index COVID-19 tests without a reference standard</p> <p>Articles on clinical COVID-19 diagnosis alone without verification with any laboratory test</p> |

| Section/topic       | #        | Checklist item                                                                                                                                                                       | Information reported                |                          | Line number(s)                                                                                                                                                                                                                                                                                                                                                                                                                                                                                                                                                                                                                                                                                                                                                                                                                                                                             |    |          |                 |         |  |  |  |  |
|---------------------|----------|--------------------------------------------------------------------------------------------------------------------------------------------------------------------------------------|-------------------------------------|--------------------------|--------------------------------------------------------------------------------------------------------------------------------------------------------------------------------------------------------------------------------------------------------------------------------------------------------------------------------------------------------------------------------------------------------------------------------------------------------------------------------------------------------------------------------------------------------------------------------------------------------------------------------------------------------------------------------------------------------------------------------------------------------------------------------------------------------------------------------------------------------------------------------------------|----|----------|-----------------|---------|--|--|--|--|
|                     |          |                                                                                                                                                                                      | Yes                                 | No                       |                                                                                                                                                                                                                                                                                                                                                                                                                                                                                                                                                                                                                                                                                                                                                                                                                                                                                            |    |          |                 |         |  |  |  |  |
|                     |          |                                                                                                                                                                                      |                                     |                          | <p>Articles of Modeling studies on COVID-19 testing</p> <p>Manufacturers brochures on COVID-19 testing</p> <p>Articles done in children &lt;18 years as they are an unlikely source of transmission</p> <p>Articles on COVID-19 laboratory tests not recommended by WHO</p>                                                                                                                                                                                                                                                                                                                                                                                                                                                                                                                                                                                                                |    |          |                 |         |  |  |  |  |
| Information sources | 9        | Describe all intended information sources (e.g., electronic databases, contact with study authors, trial registers, or other grey literature sources) with planned dates of coverage | <input checked="" type="checkbox"/> | <input type="checkbox"/> | <p>171-181</p> <p>Search will be performed on the following databases; PubMed, Google Scholar, MEDLINE , SCOPUS, Web of Science and the WHO Global Index Medicus. Manual searches will be conducted in websites of organizations championing COVID-19 management for grey literature including but not limited to; Manufacturers of COVID-19 laboratory tests, Centers for disease control and prevention (CDC) in Africa, China, Europe and the USA, World Health Organization (WHO), Specialized research institutions in Africa such as the Uganda Virus Research Institute (UVRI) and Kenya medical research institute (KEMRI) and Departments of Health in Uganda such as the Ministry of Health Uganda, South Africa, Nigeria, Rwanda and Kenya. A list of key Experts in diagnosis and testing was also developed and contacted to get more information on this subject matter.</p> |    |          |                 |         |  |  |  |  |
| Search strategy     | 10       | Present draft of search strategy to                                                                                                                                                  | <input checked="" type="checkbox"/> | <input type="checkbox"/> | <p>155-164</p> <table border="1"> <thead> <tr> <th>SN</th> <th>DATABASE</th> <th>SEARCH STRATEGY</th> <th>RESULTS</th> </tr> </thead> <tbody> <tr> <td></td> <td></td> <td></td> <td></td> </tr> </tbody> </table>                                                                                                                                                                                                                                                                                                                                                                                                                                                                                                                                                                                                                                                                         | SN | DATABASE | SEARCH STRATEGY | RESULTS |  |  |  |  |
| SN                  | DATABASE | SEARCH STRATEGY                                                                                                                                                                      | RESULTS                             |                          |                                                                                                                                                                                                                                                                                                                                                                                                                                                                                                                                                                                                                                                                                                                                                                                                                                                                                            |    |          |                 |         |  |  |  |  |
|                     |          |                                                                                                                                                                                      |                                     |                          |                                                                                                                                                                                                                                                                                                                                                                                                                                                                                                                                                                                                                                                                                                                                                                                                                                                                                            |    |          |                 |         |  |  |  |  |

| Section/topic | # | Checklist item                                                                                         | Information reported |    | Line number(s) |                             |                                                                                                                                                                                                                                                                                                                                                                                                                                     |        |  |
|---------------|---|--------------------------------------------------------------------------------------------------------|----------------------|----|----------------|-----------------------------|-------------------------------------------------------------------------------------------------------------------------------------------------------------------------------------------------------------------------------------------------------------------------------------------------------------------------------------------------------------------------------------------------------------------------------------|--------|--|
|               |   |                                                                                                        | Yes                  | No |                |                             |                                                                                                                                                                                                                                                                                                                                                                                                                                     |        |  |
|               |   | be used for at least one electronic database, including planned limits, such that it could be repeated |                      |    | 1              | PUBMED-SEARCHED 5 JULY 2020 | In Text Word:<br>Coronavirus<br>Corona virus<br>Coronavirus-2<br>Corona virus-2<br>Novel coronavirus<br>Novel corona virus<br>Coronavirus Infection*<br>Corona virus Infection*<br>Coronavirus disease<br>Corona virus disease<br>Coronavirus disease 2019<br>Corona virus disease 2019<br>Coronavirus disease-19<br>Corona virus disease-19<br>2019 novel coronavirus<br>2019 novel corona virus<br>2019 novel coronavirus disease | 43,741 |  |



| Section/topic | # | Checklist item | Information reported |    | Line number(s)                                                                                                                                                                                                                                                                                                                                                                                                           |
|---------------|---|----------------|----------------------|----|--------------------------------------------------------------------------------------------------------------------------------------------------------------------------------------------------------------------------------------------------------------------------------------------------------------------------------------------------------------------------------------------------------------------------|
|               |   |                | Yes                  | No |                                                                                                                                                                                                                                                                                                                                                                                                                          |
|               |   |                |                      |    | 2019 novel corona virus disease<br>2019 novel coronavirus disease<br>2019 novel coronavirus infection*<br>2019 novel corona virus infection*<br>Novel Respiratory 2019 Coronavirus<br>Novel Respiratory 2019 Corona virus<br>2019-nCoV infection*<br>2019-nCoV disease<br>COVID-19<br>COVID19<br>COVID-19 virus infection*<br>COVID-19 pandemic<br>SARS-Cov-2<br>SARS-CoV-2 infection*<br>SARS-COV2<br>Wuhan pneumonia ) |
|               |   |                |                      |    | Test*[Mesh Terms] 6,073,060                                                                                                                                                                                                                                                                                                                                                                                              |

| Section/topic | # | Checklist item | Information reported |    | Line number(s)                                                                                                                                                                                                                                            |
|---------------|---|----------------|----------------------|----|-----------------------------------------------------------------------------------------------------------------------------------------------------------------------------------------------------------------------------------------------------------|
|               |   |                | Yes                  | No |                                                                                                                                                                                                                                                           |
|               |   |                |                      |    | In TiAb:<br>Test*<br>Diagnos*<br>Point of care test*<br>Laboratory test*<br>Antibod*<br>Diagnostic kit<br>Antigen test*<br>Antigen detect*<br>Antigen reagent<br>Antigen strip*<br>Rapid test*<br>Rapid kit*<br>IgM<br>IgG<br>IgA<br>Serological<br>ELISA |

| Section/topic        | #  | Checklist item                                                                                           | Information reported                |                          | Line number(s)                                         |                                                                                                                                                                                                                                                                                                                                                                                                                                |
|----------------------|----|----------------------------------------------------------------------------------------------------------|-------------------------------------|--------------------------|--------------------------------------------------------|--------------------------------------------------------------------------------------------------------------------------------------------------------------------------------------------------------------------------------------------------------------------------------------------------------------------------------------------------------------------------------------------------------------------------------|
|                      |    |                                                                                                          | Yes                                 | No                       |                                                        |                                                                                                                                                                                                                                                                                                                                                                                                                                |
|                      |    |                                                                                                          |                                     |                          | 1 AND 2                                                | 11,120                                                                                                                                                                                                                                                                                                                                                                                                                         |
|                      |    |                                                                                                          |                                     |                          | LMICs (see filter below)                               | 1,984,565                                                                                                                                                                                                                                                                                                                                                                                                                      |
|                      |    |                                                                                                          |                                     |                          | 1 AND 2 AND 3                                          | 3,126                                                                                                                                                                                                                                                                                                                                                                                                                          |
|                      |    |                                                                                                          |                                     |                          | "2020"[Date - Publication]                             | 1,707                                                                                                                                                                                                                                                                                                                                                                                                                          |
|                      |    |                                                                                                          |                                     |                          | Relevant studies after pilot screening of 100 articles | 13                                                                                                                                                                                                                                                                                                                                                                                                                             |
| <b>STUDY RECORDS</b> |    |                                                                                                          |                                     |                          |                                                        |                                                                                                                                                                                                                                                                                                                                                                                                                                |
| Data management      | 11 | Describe the mechanism(s) that will be used to manage records and data throughout the review             | <input checked="" type="checkbox"/> | <input type="checkbox"/> | 210-213                                                |                                                                                                                                                                                                                                                                                                                                                                                                                                |
| Selection processes  | 11 | State the process that will be used for selecting studies (e.g., two independent reviewers) through each | <input checked="" type="checkbox"/> | <input type="checkbox"/> | 197-204                                                | The retrieved articles will be exported to Endnote and duplicates removed. The studies shall then be screened in duplicate following <i>a priori</i> criteria and the PRISMA guidelines. The screening will be performed independently by two review team pairs (KOO, EK, LN and EN), any disagreements between the reviewers will be resolved by consensus and further disagreements referred to the tie breaker (EAO or OM). |

| Section/topic             | #           | Checklist item                                                                                                                                                                       | Information reported                |                          | Line number(s)                                                                                                                                       |                |             |  |  |
|---------------------------|-------------|--------------------------------------------------------------------------------------------------------------------------------------------------------------------------------------|-------------------------------------|--------------------------|------------------------------------------------------------------------------------------------------------------------------------------------------|----------------|-------------|--|--|
|                           |             |                                                                                                                                                                                      | Yes                                 | No                       |                                                                                                                                                      |                |             |  |  |
|                           |             | phase of the review (i.e., screening, eligibility, and inclusion in meta-analysis)                                                                                                   |                                     |                          |                                                                                                                                                      |                |             |  |  |
| Data collection processes | 11          | Describe planned method of extracting data from reports (e.g., piloting forms, done independently, in duplicate), any processes for obtaining and confirming data from investigators | <input checked="" type="checkbox"/> | <input type="checkbox"/> | 219-238                                                                                                                                              |                |             |  |  |
| Data items                | 12          | List and define all variables for which                                                                                                                                              | <input checked="" type="checkbox"/> | <input type="checkbox"/> | 152-154                                                                                                                                              |                |             |  |  |
|                           |             |                                                                                                                                                                                      |                                     |                          | <table border="1"> <thead> <tr> <th>PICOST element</th> <th>Description</th> </tr> </thead> <tbody> <tr> <td></td> <td></td> </tr> </tbody> </table> | PICOST element | Description |  |  |
| PICOST element            | Description |                                                                                                                                                                                      |                                     |                          |                                                                                                                                                      |                |             |  |  |
|                           |             |                                                                                                                                                                                      |                                     |                          |                                                                                                                                                      |                |             |  |  |

| Section/topic                      | #                                                                                                                                                                          | Checklist item                                                                                                             | Information reported                |                          | Line number(s)                                                                                                                                                                                                                                                                                                                                                                                                                                                                                                                                                                                                                                                                                                                                                                                                                                                                                                                                                                             |            |                                              |                           |                                                                                             |            |                                                                                                                     |         |                                                                                                                                                                            |               |                                                                                                                                        |         |                                         |                              |                  |
|------------------------------------|----------------------------------------------------------------------------------------------------------------------------------------------------------------------------|----------------------------------------------------------------------------------------------------------------------------|-------------------------------------|--------------------------|--------------------------------------------------------------------------------------------------------------------------------------------------------------------------------------------------------------------------------------------------------------------------------------------------------------------------------------------------------------------------------------------------------------------------------------------------------------------------------------------------------------------------------------------------------------------------------------------------------------------------------------------------------------------------------------------------------------------------------------------------------------------------------------------------------------------------------------------------------------------------------------------------------------------------------------------------------------------------------------------|------------|----------------------------------------------|---------------------------|---------------------------------------------------------------------------------------------|------------|---------------------------------------------------------------------------------------------------------------------|---------|----------------------------------------------------------------------------------------------------------------------------------------------------------------------------|---------------|----------------------------------------------------------------------------------------------------------------------------------------|---------|-----------------------------------------|------------------------------|------------------|
|                                    |                                                                                                                                                                            |                                                                                                                            | Yes                                 | No                       |                                                                                                                                                                                                                                                                                                                                                                                                                                                                                                                                                                                                                                                                                                                                                                                                                                                                                                                                                                                            |            |                                              |                           |                                                                                             |            |                                                                                                                     |         |                                                                                                                                                                            |               |                                                                                                                                        |         |                                         |                              |                  |
|                                    |                                                                                                                                                                            | data will be sought (e.g., PICO items, funding sources), any pre-planned data assumptions and simplifications              |                                     |                          | <table border="1"> <tr> <td>Population</td> <td>Adults (18 years and above) in LMIC settings</td> </tr> <tr> <td>Intervention/<br/>Exposure</td> <td>New index laboratory test; peripheral laboratory testing strategy or mass testing (pooling)</td> </tr> <tr> <td>Comparator</td> <td>Reference tests for COVID-19 (gold standard); current standard of testing strategy (centralized and individualized)</td> </tr> <tr> <td>Outcome</td> <td>Types of tests available; diagnostic test accuracy (sensitivity, specificity, predictive values); costs and cost-effectiveness of tests; relative risk of testing strategy</td> </tr> <tr> <td>Study designs</td> <td>Observational studies (cross sectional, case control and cohort studies), and Randomized Control Trials on COVID-19 laboratory testing</td> </tr> <tr> <td>Setting</td> <td>Low- and middle-income countries (LMIC)</td> </tr> <tr> <td>Timing of outcome assessment</td> <td>Jan 2020 to date</td> </tr> </table> | Population | Adults (18 years and above) in LMIC settings | Intervention/<br>Exposure | New index laboratory test; peripheral laboratory testing strategy or mass testing (pooling) | Comparator | Reference tests for COVID-19 (gold standard); current standard of testing strategy (centralized and individualized) | Outcome | Types of tests available; diagnostic test accuracy (sensitivity, specificity, predictive values); costs and cost-effectiveness of tests; relative risk of testing strategy | Study designs | Observational studies (cross sectional, case control and cohort studies), and Randomized Control Trials on COVID-19 laboratory testing | Setting | Low- and middle-income countries (LMIC) | Timing of outcome assessment | Jan 2020 to date |
| Population                         | Adults (18 years and above) in LMIC settings                                                                                                                               |                                                                                                                            |                                     |                          |                                                                                                                                                                                                                                                                                                                                                                                                                                                                                                                                                                                                                                                                                                                                                                                                                                                                                                                                                                                            |            |                                              |                           |                                                                                             |            |                                                                                                                     |         |                                                                                                                                                                            |               |                                                                                                                                        |         |                                         |                              |                  |
| Intervention/<br>Exposure          | New index laboratory test; peripheral laboratory testing strategy or mass testing (pooling)                                                                                |                                                                                                                            |                                     |                          |                                                                                                                                                                                                                                                                                                                                                                                                                                                                                                                                                                                                                                                                                                                                                                                                                                                                                                                                                                                            |            |                                              |                           |                                                                                             |            |                                                                                                                     |         |                                                                                                                                                                            |               |                                                                                                                                        |         |                                         |                              |                  |
| Comparator                         | Reference tests for COVID-19 (gold standard); current standard of testing strategy (centralized and individualized)                                                        |                                                                                                                            |                                     |                          |                                                                                                                                                                                                                                                                                                                                                                                                                                                                                                                                                                                                                                                                                                                                                                                                                                                                                                                                                                                            |            |                                              |                           |                                                                                             |            |                                                                                                                     |         |                                                                                                                                                                            |               |                                                                                                                                        |         |                                         |                              |                  |
| Outcome                            | Types of tests available; diagnostic test accuracy (sensitivity, specificity, predictive values); costs and cost-effectiveness of tests; relative risk of testing strategy |                                                                                                                            |                                     |                          |                                                                                                                                                                                                                                                                                                                                                                                                                                                                                                                                                                                                                                                                                                                                                                                                                                                                                                                                                                                            |            |                                              |                           |                                                                                             |            |                                                                                                                     |         |                                                                                                                                                                            |               |                                                                                                                                        |         |                                         |                              |                  |
| Study designs                      | Observational studies (cross sectional, case control and cohort studies), and Randomized Control Trials on COVID-19 laboratory testing                                     |                                                                                                                            |                                     |                          |                                                                                                                                                                                                                                                                                                                                                                                                                                                                                                                                                                                                                                                                                                                                                                                                                                                                                                                                                                                            |            |                                              |                           |                                                                                             |            |                                                                                                                     |         |                                                                                                                                                                            |               |                                                                                                                                        |         |                                         |                              |                  |
| Setting                            | Low- and middle-income countries (LMIC)                                                                                                                                    |                                                                                                                            |                                     |                          |                                                                                                                                                                                                                                                                                                                                                                                                                                                                                                                                                                                                                                                                                                                                                                                                                                                                                                                                                                                            |            |                                              |                           |                                                                                             |            |                                                                                                                     |         |                                                                                                                                                                            |               |                                                                                                                                        |         |                                         |                              |                  |
| Timing of outcome assessment       | Jan 2020 to date                                                                                                                                                           |                                                                                                                            |                                     |                          |                                                                                                                                                                                                                                                                                                                                                                                                                                                                                                                                                                                                                                                                                                                                                                                                                                                                                                                                                                                            |            |                                              |                           |                                                                                             |            |                                                                                                                     |         |                                                                                                                                                                            |               |                                                                                                                                        |         |                                         |                              |                  |
| <b>Outcomes and prioritization</b> | 1<br>3                                                                                                                                                                     | List and define all outcomes for which data will be sought, including prioritization of main and additional outcomes, with | <input checked="" type="checkbox"/> | <input type="checkbox"/> | <p>232-241</p> <p>1) Primary outcome: The primary outcome of this review will be the Diagnostic test accuracy of COVID-19 laboratory test methods in LMICs. Given that these tests are being issued under emergency authorization, a dearth of evidence for their accuracy exists in resource limited settings, and hence the prioritization.</p> <p>2) Secondary outcomes: The secondary outcomes of this review shall be the types of COVID-19 tests that are available in low- and middle-income countries; the cost of each type of COVID-19 test available in low- and middle-income countries; the utility of testing for control of COVID-19 in low- and middle-income countries; relative risk / effect of the testing strategy and costs and cost-effectiveness (ICER) of the various COVID-19 testing algorithms.</p>                                                                                                                                                            |            |                                              |                           |                                                                                             |            |                                                                                                                     |         |                                                                                                                                                                            |               |                                                                                                                                        |         |                                         |                              |                  |

| Section/topic                             | #   | Checklist item                                                                                                                                                                                                       | Information reported                |                          | Line number(s) |
|-------------------------------------------|-----|----------------------------------------------------------------------------------------------------------------------------------------------------------------------------------------------------------------------|-------------------------------------|--------------------------|----------------|
|                                           |     |                                                                                                                                                                                                                      | Yes                                 | No                       |                |
|                                           |     | rationale                                                                                                                                                                                                            |                                     |                          |                |
| <b>Risk of bias in individual studies</b> | 14  | Describe anticipated methods for assessing risk of bias of individual studies, including whether this will be done at the outcome or study level, or both; state how this information will be used in data synthesis | <input checked="" type="checkbox"/> | <input type="checkbox"/> | 255-270        |
| <b>DATA</b>                               |     |                                                                                                                                                                                                                      |                                     |                          |                |
| <b>Synthesis</b>                          | 15a | Describe criteria under which study data will be                                                                                                                                                                     | <input checked="" type="checkbox"/> | <input type="checkbox"/> | 244-254        |

| Section/topic | #   | Checklist item                                                                                                                                                                                                                              | Information reported                |                                     | Line number(s) |
|---------------|-----|---------------------------------------------------------------------------------------------------------------------------------------------------------------------------------------------------------------------------------------------|-------------------------------------|-------------------------------------|----------------|
|               |     |                                                                                                                                                                                                                                             | Yes                                 | No                                  |                |
|               |     | quantitatively synthesized                                                                                                                                                                                                                  |                                     |                                     |                |
|               | 15b | If data are appropriate for quantitative synthesis, describe planned summary measures, methods of handling data, and methods of combining data from studies, including any planned exploration of consistency (e.g., $I^2$ , Kendall's tau) | <input checked="" type="checkbox"/> | <input type="checkbox"/>            | 270-274        |
|               | 15c | Describe any proposed additional analyses                                                                                                                                                                                                   | <input type="checkbox"/>            | <input checked="" type="checkbox"/> | Not applicable |

| Section/topic        | #   | Checklist item                                                                                                              | Information reported                |                          | Line number(s) |
|----------------------|-----|-----------------------------------------------------------------------------------------------------------------------------|-------------------------------------|--------------------------|----------------|
|                      |     |                                                                                                                             | Yes                                 | No                       |                |
|                      |     | (e.g., sensitivity or subgroup analyses, meta-regression)                                                                   |                                     |                          |                |
|                      | 15d | If quantitative synthesis is not appropriate, describe the type of summary planned                                          | <input type="checkbox"/>            | <input type="checkbox"/> |                |
| <b>Meta-bias(es)</b> | 16  | Specify any planned assessment of meta-bias(es) (e.g., publication bias across studies, selective reporting within studies) | <input checked="" type="checkbox"/> | <input type="checkbox"/> | 262-270        |
| <b>Confidence</b>    | 17  | Describe how the                                                                                                            | <input checked="" type="checkbox"/> | <input type="checkbox"/> | 280-283        |



| Section/topic          | # | Checklist item                                                  | Information reported |    | Line number(s) |
|------------------------|---|-----------------------------------------------------------------|----------------------|----|----------------|
|                        |   |                                                                 | Yes                  | No |                |
| in cumulative evidence |   | strength of the body of evidence will be assessed (e.g., GRADE) |                      |    |                |
