# Supplementary material for: Role and utility of COVID-19 laboratory testing in low-income and middle-income countries: protocol for rapid evidence synthesis
Source: HighWire-hosted journal article supplement (doi:10.1136/bmjopen-2021-050296), 2021-10-01
Supplement: bmjopen-2021-050296supp003_data_supplement.pdf [file bmjopen-2021-050296supp003_data_supplement.pdf]

| Study ID | Lead author | Type of reference<br>(journal article,<br>WHO document) | Publication year |
|----------|-------------|---------------------------------------------------------|------------------|
|          |             |                                                         |                  |
|          |             |                                                         |                  |
|          |             |                                                         |                  |
|          |             |                                                         |                  |
|          |             |                                                         |                  |
|          |             |                                                         |                  |
|          |             |                                                         |                  |
|          |             |                                                         |                  |
|          |             |                                                         |                  |
|          |             |                                                         |                  |
|          |             |                                                         |                  |
|          |             |                                                         |                  |
|          |             |                                                         |                  |
|          |             |                                                         |                  |
|          |             |                                                         |                  |
|          |             |                                                         |                  |
|          |             |                                                         |                  |
|          |             |                                                         |                  |
|          |             |                                                         |                  |
|          |             |                                                         |                  |
|          |             |                                                         |                  |
|          |             |                                                         |                  |
|          |             |                                                         |                  |
|          |             |                                                         |                  |
|          |             |                                                         |                  |



| Year of data collection | Country( tries) where study was done | Citation | Funder |
|-------------------------|--------------------------------------|----------|--------|
|                         |                                      |          |        |
|                         |                                      |          |        |
|                         |                                      |          |        |
|                         |                                      |          |        |
|                         |                                      |          |        |
|                         |                                      |          |        |
|                         |                                      |          |        |
|                         |                                      |          |        |
|                         |                                      |          |        |
|                         |                                      |          |        |
|                         |                                      |          |        |
|                         |                                      |          |        |
|                         |                                      |          |        |
|                         |                                      |          |        |
|                         |                                      |          |        |
|                         |                                      |          |        |
|                         |                                      |          |        |
|                         |                                      |          |        |
|                         |                                      |          |        |
|                         |                                      |          |        |



| ethical approval obtained? | Name of ethics approving body | Design | Median age | study population or participants |
|----------------------------|-------------------------------|--------|------------|----------------------------------|
|                            |                               |        |            |                                  |
|                            |                               |        |            |                                  |
|                            |                               |        |            |                                  |
|                            |                               |        |            |                                  |
|                            |                               |        |            |                                  |
|                            |                               |        |            |                                  |
|                            |                               |        |            |                                  |
|                            |                               |        |            |                                  |
|                            |                               |        |            |                                  |
|                            |                               |        |            |                                  |
|                            |                               |        |            |                                  |
|                            |                               |        |            |                                  |
|                            |                               |        |            |                                  |
|                            |                               |        |            |                                  |
|                            |                               |        |            |                                  |
|                            |                               |        |            |                                  |
|                            |                               |        |            |                                  |
|                            |                               |        |            |                                  |
|                            |                               |        |            |                                  |
|                            |                               |        |            |                                  |
|                            |                               |        |            |                                  |
|                            |                               |        |            |                                  |
|                            |                               |        |            |                                  |
|                            |                               |        |            |                                  |



| Severity of disease | Type of test | setting for the testing | sample size | sample size - cases |
|---------------------|--------------|-------------------------|-------------|---------------------|
|                     |              |                         |             |                     |
|                     |              |                         |             |                     |
|                     |              |                         |             |                     |
|                     |              |                         |             |                     |
|                     |              |                         |             |                     |
|                     |              |                         |             |                     |
|                     |              |                         |             |                     |
|                     |              |                         |             |                     |
|                     |              |                         |             |                     |
|                     |              |                         |             |                     |
|                     |              |                         |             |                     |
|                     |              |                         |             |                     |
|                     |              |                         |             |                     |
|                     |              |                         |             |                     |
|                     |              |                         |             |                     |
|                     |              |                         |             |                     |
|                     |              |                         |             |                     |
|                     |              |                         |             |                     |
|                     |              |                         |             |                     |





| Sample size-control arm | Response rate | Details of the test | Matrix used | samples tested onsite |
|-------------------------|---------------|---------------------|-------------|-----------------------|
|                         |               |                     |             |                       |
|                         |               |                     |             |                       |
|                         |               |                     |             |                       |
|                         |               |                     |             |                       |
|                         |               |                     |             |                       |
|                         |               |                     |             |                       |
|                         |               |                     |             |                       |
|                         |               |                     |             |                       |
|                         |               |                     |             |                       |
|                         |               |                     |             |                       |
|                         |               |                     |             |                       |
|                         |               |                     |             |                       |
|                         |               |                     |             |                       |
|                         |               |                     |             |                       |
|                         |               |                     |             |                       |
|                         |               |                     |             |                       |
|                         |               |                     |             |                       |
|                         |               |                     |             |                       |
|                         |               |                     |             |                       |
|                         |               |                     |             |                       |



| sample transported and tested off site | Cost of test | Funder for the test (self and funded) | TAT | measure for covid detection under PCR |
|----------------------------------------|--------------|---------------------------------------|-----|---------------------------------------|
|                                        |              |                                       |     |                                       |
|                                        |              |                                       |     |                                       |
|                                        |              |                                       |     |                                       |
|                                        |              |                                       |     |                                       |
|                                        |              |                                       |     |                                       |
|                                        |              |                                       |     |                                       |
|                                        |              |                                       |     |                                       |
|                                        |              |                                       |     |                                       |
|                                        |              |                                       |     |                                       |
|                                        |              |                                       |     |                                       |
|                                        |              |                                       |     |                                       |
|                                        |              |                                       |     |                                       |
|                                        |              |                                       |     |                                       |
|                                        |              |                                       |     |                                       |
|                                        |              |                                       |     |                                       |



| measure for covid detection | Positives - PCR | Positives - point of care test | positives culture test | Negatives - PCR | Negatives- point of care test |
|-----------------------------|-----------------|--------------------------------|------------------------|-----------------|-------------------------------|
|                             |                 |                                |                        |                 |                               |
|                             |                 |                                |                        |                 |                               |
|                             |                 |                                |                        |                 |                               |
|                             |                 |                                |                        |                 |                               |
|                             |                 |                                |                        |                 |                               |
|                             |                 |                                |                        |                 |                               |
|                             |                 |                                |                        |                 |                               |
|                             |                 |                                |                        |                 |                               |
|                             |                 |                                |                        |                 |                               |
|                             |                 |                                |                        |                 |                               |
|                             |                 |                                |                        |                 |                               |
|                             |                 |                                |                        |                 |                               |
|                             |                 |                                |                        |                 |                               |
|                             |                 |                                |                        |                 |                               |
|                             |                 |                                |                        |                 |                               |
|                             |                 |                                |                        |                 |                               |



| Sensitivity - PCR | Sensitivity - point of care test | Specificity - PCR | Specificity - point of care test | Test side-effects | PPV FOR PCR |
|-------------------|----------------------------------|-------------------|----------------------------------|-------------------|-------------|
|                   |                                  |                   |                                  |                   |             |
|                   |                                  |                   |                                  |                   |             |
|                   |                                  |                   |                                  |                   |             |
|                   |                                  |                   |                                  |                   |             |
|                   |                                  |                   |                                  |                   |             |
|                   |                                  |                   |                                  |                   |             |
|                   |                                  |                   |                                  |                   |             |
|                   |                                  |                   |                                  |                   |             |
|                   |                                  |                   |                                  |                   |             |
|                   |                                  |                   |                                  |                   |             |
|                   |                                  |                   |                                  |                   |             |
|                   |                                  |                   |                                  |                   |             |
|                   |                                  |                   |                                  |                   |             |
|                   |                                  |                   |                                  |                   |             |
|                   |                                  |                   |                                  |                   |             |
|                   |                                  |                   |                                  |                   |             |
|                   |                                  |                   |                                  |                   |             |
|                   |                                  |                   |                                  |                   |             |
|                   |                                  |                   |                                  |                   |             |
|                   |                                  |                   |                                  |                   |             |









| Total negative % | cost effectiveness | other comments |
|------------------|--------------------|----------------|
|                  |                    |                |
|                  |                    |                |
|                  |                    |                |
|                  |                    |                |
|                  |                    |                |
|                  |                    |                |
|                  |                    |                |
|                  |                    |                |
|                  |                    |                |
|                  |                    |                |
|                  |                    |                |
|                  |                    |                |
|                  |                    |                |
|                  |                    |                |
|                  |                    |                |
|                  |                    |                |
|                  |                    |                |
|                  |                    |                |
|                  |                    |                |
